# Supplementary material for: Differences in tumor size, clinical, demographic, and socioeconomic profiles of central nervous system tumors among a racially diverse cohort: A retrospective case–control study
Source: PubMed Central journal article supplement — Surg Neurol Int. 2024 Dec 13;15:459. doi: 10.25259/SNI_190_2024 (PMC11704430; doi:10.25259/sni_190_2024), 2024-12-13
Supplement: SNI-15-459-s001.pdf [file SNI-15-459-s001.pdf]

**Supplementary Table 1:** Number of patients stratified by tumor dimensions, sociodemographic characteristics, and medical comorbidities.

|                                                  | All Tumors |          | All Meningiomas |          | Benign Meningiomas |          | Malignant Meningiomas |          | All Gliomas |          | Gliomas (Grades I-III) |          | Gliomas (Grade IV) |          | Schwannomas |          | Acoustic Neuromas |          | Pituitary Tumors |          | Metastases |          |  |
|--------------------------------------------------|------------|----------|-----------------|----------|--------------------|----------|-----------------------|----------|-------------|----------|------------------------|----------|--------------------|----------|-------------|----------|-------------------|----------|------------------|----------|------------|----------|--|
|                                                  | Cases      | Controls | Cases           | Controls | Cases              | Controls | Cases                 | Controls | Cases       | Controls | Cases                  | Controls | Cases              | Controls | Cases       | Controls | Cases             | Controls | Cases            | Controls | Cases      | Controls |  |
| 3D tumor volume                                  |            |          |                 |          |                    |          |                       |          |             |          |                        |          |                    |          |             |          |                   |          |                  |          |            |          |  |
| White                                            | NA         | NA       | 32              | NA       | 28                 | NA       | 4                     | NA       | 26          | NA       | 1                      | NA       | 7                  | NA       | 2           | NA       | 1                 | NA       | 2                | NA       | 7          | NA       |  |
| Asian                                            | NA         | NA       | 26              | NA       | 22                 | NA       | 4                     | NA       | 3           | NA       | 3                      | NA       | 0                  | NA       | 6           | NA       | 4                 | NA       | 4                | NA       | 4          | NA       |  |
| NHPi                                             | NA         | NA       | 21              | NA       | 17                 | NA       | 4                     | NA       | 3           | NA       | 3                      | NA       | 0                  | NA       | 5           | NA       | 4                 | NA       | 4                | NA       | 5          | NA       |  |
| Hispanic                                         | NA         | NA       | 2               | NA       | 2                  | NA       | 0                     | NA       | 0           | NA       | 0                      | NA       | 0                  | NA       | 0           | NA       | 0                 | NA       | 1                | NA       | 0          | NA       |  |
| Black                                            | NA         | NA       | 1               | NA       | 0                  | NA       | 1                     | NA       | 0           | NA       | 0                      | NA       | 0                  | NA       | 0           | NA       | 0                 | NA       | 0                | NA       | 1          | NA       |  |
| NAAN                                             | NA         | NA       | 0               | NA       | 0                  | NA       | 0                     | NA       | 0           | NA       | 0                      | NA       | 0                  | NA       | 0           | NA       | 0                 | NA       | 0                | NA       | 0          | NA       |  |
| 2D tumor volume                                  |            |          |                 |          |                    |          |                       |          |             |          |                        |          |                    |          |             |          |                   |          |                  |          |            |          |  |
| White                                            | NA         | NA       | 45              | NA       | 41                 | NA       | 4                     | NA       | 26          | NA       | 2                      | NA       | 8                  | NA       | 2           | NA       | 1                 | NA       | 3                | NA       | 13         | NA       |  |
| Asian                                            | NA         | NA       | 32              | NA       | 25                 | NA       | 7                     | NA       | 3           | NA       | 3                      | NA       | 0                  | NA       | 8           | NA       | 7                 | NA       | 6                | NA       | 5          | NA       |  |
| NHPi                                             | NA         | NA       | 23              | NA       | 19                 | NA       | 4                     | NA       | 4           | NA       | 3                      | NA       | 1                  | NA       | 6           | NA       | 5                 | NA       | 5                | NA       | 6          | NA       |  |
| Hispanic                                         | NA         | NA       | 2               | NA       | 2                  | NA       | 0                     | NA       | 0           | NA       | 0                      | NA       | 0                  | NA       | 0           | NA       | 0                 | NA       | 1                | NA       | 0          | NA       |  |
| Black                                            | NA         | NA       | 1               | NA       | 0                  | NA       | 1                     | NA       | 0           | NA       | 0                      | NA       | 0                  | NA       | 0           | NA       | 0                 | NA       | 0                | NA       | 1          | NA       |  |
| NAAN                                             | NA         | NA       | 2               | NA       | 2                  | NA       | 0                     | NA       | 0           | NA       | 0                      | NA       | 0                  | NA       | 0           | NA       | 0                 | NA       | 0                | NA       | 0          | NA       |  |
| Largest tumor dimension                          |            |          |                 |          |                    |          |                       |          |             |          |                        |          |                    |          |             |          |                   |          |                  |          |            |          |  |
| White                                            | NA         | NA       | 56              | NA       | 49                 | NA       | 7                     | NA       | 26          | NA       | 4                      | NA       | 11                 | NA       | 4           | NA       | 3                 | NA       | 3                | NA       | 14         | NA       |  |
| Asian                                            | NA         | NA       | 35              | NA       | 27                 | NA       | 8                     | NA       | 5           | NA       | 3                      | NA       | 2                  | NA       | 9           | NA       | 8                 | NA       | 7                | NA       | 8          | NA       |  |
| NHPi                                             | NA         | NA       | 30              | NA       | 23                 | NA       | 7                     | NA       | 6           | NA       | 4                      | NA       | 2                  | NA       | 6           | NA       | 5                 | NA       | 5                | NA       | 7          | NA       |  |
| Hispanic                                         | NA         | NA       | 6               | NA       | 5                  | NA       | 1                     | NA       | 0           | NA       | 0                      | NA       | 0                  | NA       | 0           | NA       | 0                 | NA       | 1                | NA       | 0          | NA       |  |
| Black                                            | NA         | NA       | 1               | NA       | 0                  | NA       | 1                     | NA       | 0           | NA       | 0                      | NA       | 0                  | NA       | 0           | NA       | 0                 | NA       | 0                | NA       | 1          | NA       |  |
| NAAN                                             | NA         | NA       | 3               | NA       | 3                  | NA       | 0                     | NA       | 0           | NA       | 0                      | NA       | 0                  | NA       | 0           | NA       | 0                 | NA       | 0                | NA       | 0          | NA       |  |
| Resection Status                                 |            |          |                 |          |                    |          |                       |          |             |          |                        |          |                    |          |             |          |                   |          |                  |          |            |          |  |
| Female                                           | NA         | NA       | 116             | NA       | 93                 | NA       | 23                    | NA       | 6           | NA       | 3                      | NA       | 3                  | NA       | 6           | NA       | 4                 | NA       | 2                | NA       | NA         | NA       |  |
| Male                                             | NA         | NA       | 6               | NA       | 36                 | NA       | 6                     | NA       | 3           | NA       | 2                      | NA       | 1                  | NA       | 4           | NA       | 4                 | NA       | 0                | NA       | NA         | NA       |  |
| White                                            | NA         | NA       | 6               | NA       | 56                 | NA       | 8                     | NA       | 6           | NA       | 3                      | NA       | 3                  | NA       | 4           | NA       | 3                 | NA       | 0                | NA       | NA         | NA       |  |
| Asian                                            | NA         | NA       | 9               | NA       | 38                 | NA       | 9                     | NA       | 1           | NA       | 1                      | NA       | 0                  | NA       | 1           | NA       | 1                 | NA       | 0                | NA       | NA         | NA       |  |
| NHPi                                             | NA         | NA       | 6               | NA       | 26                 | NA       | 8                     | NA       | 1           | NA       | 1                      | NA       | 0                  | NA       | 4           | NA       | 3                 | NA       | 2                | NA       | NA         | NA       |  |
| Hispanic                                         | NA         | NA       | 1               | NA       | 6                  | NA       | 2                     | NA       | 0           | NA       | 0                      | NA       | 0                  | NA       | 0           | NA       | 0                 | NA       | 0                | NA       | NA         | NA       |  |
| Black                                            | NA         | NA       | 0               | NA       | 0                  | NA       | 1                     | NA       | 0           | NA       | 0                      | NA       | 0                  | NA       | 1           | NA       | 1                 | NA       | 0                | NA       | NA         | NA       |  |
| NAAN                                             | NA         | NA       | 0               | NA       | 3                  | NA       | 0                     | NA       | 0           | NA       | 0                      | NA       | 0                  | NA       | 0           | NA       | 0                 | NA       | 0                | NA       | NA         | NA       |  |
| Number of lesions                                | NA         | NA       | NA              | NA       | NA                 | NA       | NA                    | NA       | NA          | NA       | NA                     | NA       | NA                 | NA       | NA          | NA       | NA                | NA       | NA               | NA       | 28         | NA       |  |
| Age                                              | 323        | 651      | 159             | 636      | 129                | 516      | 30                    | 120      | 39          | 156      | 20                     | 80       | 19                 | 76       | 26          | 104      | 22                | 88       | 22               | 88       | 36         | 144      |  |
| Sex                                              |            |          |                 |          |                    |          |                       |          |             |          |                        |          |                    |          |             |          |                   |          |                  |          |            |          |  |
| Female                                           | 215        | 378      | 117             | 468      | 93                 | 372      | 24                    | 96       | 25          | 92       | 13                     | 43       | 12                 | 49       | 18          | 72       | 14                | 56       | 13               | 52       | 17         | 89       |  |
| Male                                             | 108        | 273      | 42              | 168      | 36                 | 144      | 6                     | 24       | 14          | 64       | 7                      | 37       | 7                  | 27       | 8           | 32       | 8                 | 32       | 9                | 36       | 19         | 55       |  |
| Race                                             |            |          |                 |          |                    |          |                       |          |             |          |                        |          |                    |          |             |          |                   |          |                  |          |            |          |  |
| Asian                                            | 93         | 157      | 48              | 192      | 38                 | 152      | 10                    | 40       | 5           | 47       | 3                      | 20       | 2                  | 27       | 9           | 36       | 8                 | 32       | 7                | 28       | 11         | 38       |  |
| White                                            | 134        | 215      | 64              | 256      | 56                 | 224      | 8                     | 32       | 26          | 65       | 12                     | 39       | 14                 | 26       | 8           | 32       | 6                 | 24       | 4                | 16       | 17         | 67       |  |
| Hispanic                                         | 10         | 34       | 8               | 32       | 6                  | 24       | 2                     | 8        | 0           | 15       | 0                      | 9        | 0                  | 6        | 0           | 0        | 0                 | 2        | 8                | 0        | 8          | 8        |  |
| NHPi                                             | 74         | 106      | 34              | 136      | 26                 | 104      | 8                     | 32       | 7           | 27       | 5                      | 12       | 2                  | 15       | 7           | 28       | 6                 | 24       | 8                | 32       | 7          | 28       |  |
| Black                                            | 4          | 7        | 1               | 4        | 0                  | 0        | 1                     | 4        | 0           | 2        | 0                      | 0        | 2                  | 1        | 4           | 1        | 4                 | 0        | 0                | 1        | 3          | 3        |  |
| NAAN                                             | 5          | 1        | 3               | 12       | 3                  | 12       | 0                     | 0        | 0           | 0        | 0                      | 0        | 0                  | 1        | 4           | 1        | 4                 | 0        | 0                | 0        | 0          | 0        |  |
| Socioeconomic variables                          |            |          |                 |          |                    |          |                       |          |             |          |                        |          |                    |          |             |          |                   |          |                  |          |            |          |  |
| Median household income                          | 321        | 1292     | 158             | 636      | 128                | 516      | 30                    | 120      | 39          | 156      | 20                     | 80       | 19                 | 76       | 26          | 104      | 22                | 88       | 22               | 88       | 35         | 144      |  |
| Overall poverty level in municipality            | 320        | 1288     | 158             | 636      | 128                | 516      | 30                    | 120      | 39          | 156      | 20                     | 80       | 19                 | 76       | 26          | 104      | 22                | 88       | 22               | 88       | 34         | 140      |  |
| Municipality poverty level for ages 18-64        | 320        | 1288     | 158             | 636      | 128                | 516      | 30                    | 120      | 39          | 156      | 20                     | 80       | 19                 | 76       | 26          | 104      | 22                | 88       | 22               | 88       | 34         | 140      |  |
| Municipality poverty level for ages 65 and older | 320        | 1288     | 158             | 636      | 128                | 516      | 30                    | 120      | 39          | 156      | 20                     | 80       | 19                 | 76       | 26          | 104      | 22                | 88       | 22               | 88       | 34         | 140      |  |
| Geographic origin population size                | 321        | 1292     | 158             | 636      | 128                | 516      | 30                    | 120      | 39          | 156      | 20                     | 80       | 19                 | 76       | 26          | 104      | 22                | 88       | 22               | 88       | 35         | 144      |  |
| Geographic origin                                |            |          |                 |          |                    |          |                       |          |             |          |                        |          |                    |          |             |          |                   |          |                  |          |            |          |  |
| Urban                                            | 206        | 754      | 101             | 382      | 74                 | 312      | 27                    | 70       | 22          | 88       | 11                     | 38       | 11                 | 50       | 19          | 57       | 15                | 44       | 15               | 54       | 26         | 84       |  |
| Suburban                                         | 113        | 526      | 55              | 249      | 52                 | 201      | 3                     | 48       | 17          | 67       | 9                      | 42       | 8                  | 25       | 7           | 46       | 7                 | 43       | 7                | 33       | 9          | 59       |  |
| Rural                                            | 2          | 12       | 2               | 5        | 2                  | 3        | 0                     | 2        | 0           | 1        | 0                      | 0        | 0                  | 1        | 0           | 1        | 0                 | 1        | 0                | 1        | 0          | 1        |  |
| Insurance type                                   |            |          |                 |          |                    |          |                       |          |             |          |                        |          |                    |          |             |          |                   |          |                  |          |            |          |  |
| Medicare                                         | 135        | 377      | 79              | 189      | 62                 | 137      | 17                    | 52       | 13          | 28       | 5                      | 8        | 8                  | 20       | 6           | 27       | 5                 | 26       | 6                | 15       | 20         | 78       |  |
| Medicaid                                         | 68         | 277      | 28              | 127      | 24                 | 105      | 4                     | 22       | 6           | 36       | 3                      | 24       | 3                  | 12       | 6           | 26       | 6                 | 23       | 5                | 31       | 8          | 20       |  |
| Private                                          | 97         | 547      | 41              | 269      | 36                 | 233      | 5                     | 36       | 18          | 78       | 11                     | 42       | 7                  | 36       | 13          | 46       | 10                | 35       | 6                | 40       | 6          | 38       |  |
| Military                                         | 19         | 88       | 10              | 50       | 7                  | 40       | 3                     | 10       | 2           | 12       | 1                      | 6        | 1                  | 6        | 0           | 5        | 0                 | 4        | 5                | 2        | 1          | 8        |  |
| Income quartiles                                 |            |          |                 |          |                    |          |                       |          |             |          |                        |          |                    |          |             |          |                   |          |                  |          |            |          |  |
| First quartile                                   | 72         | 279      | 33              | 131      | 32                 | 108      | 1                     | 23       | 11          | 34       | 4                      | 15       | 7                  | 19       | 6           | 29       | 6                 | 26       | 6                | 14       | 3          | 32       |  |
| Second quartile                                  | 60         | 283      | 30              | 137      | 27                 | 109      | 3                     | 28       | 6           | 29       | 4                      | 16       | 2                  | 13       | 5           | 29       | 5                 | 26       | 2                | 19       | 7          | 28       |  |
| Third quartile                                   | 91         | 382      | 48              | 175      | 36                 | 145      | 12                    | 30       | 17          | 54       | 10                     | 28       | 7                  | 26       | 6           | 37       | 4                 | 29       | 4                | 23       | 10         | 38       |  |
| Fourth quartile                                  | 98         | 348      | 47              | 193      | 33                 | 154      | 14                    | 39       | 5           | 39       | 2                      | 21       | 3                  | 18       | 9           | 9        | 7                 | 7        | 10               | 32       | 15         | 46       |  |
| Marital status                                   |            |          |                 |          |                    |          |                       |          |             |          |                        |          |                    |          |             |          |                   |          |                  |          |            |          |  |
| Single                                           | 74         | 346      | 38              | 131      | 33                 | 105      | 5                     | 26       | 12          | 58       | 4                      | 34       | 8                  | 24       | 6           | 31       | 5                 | 28       | 5                | 40       | 5          | 26       |  |
| Married                                          | 162        | 634      | 78              | 328      | 66                 | 264      | 12                    | 64       | 20          | 74       | 12                     | 36       | 8                  | 38       | 14          | 47       | 12                | 36       | 13               | 33       | 17         | 83       |  |
| Divorced                                         | 38         | 197      | 21              | 105      | 14                 | 90       | 7                     | 15       | 2           | 16       | 2                      | 8        | 0                  | 8        | 3           | 21       | 3                 | 19       | 1                | 12       | 4          | 14       |  |
| Widowed                                          | 32         | 91       | 15              | 54       | 11                 | 40       | 4                     | 14       | 3           | 6        | 1                      | 2        | 2                  | 4        | 2           | 3        | 1                 | 3        | 3                | 3        | 6          | 21       |  |
| Family history                                   |            |          |                 |          |                    |          |                       |          |             |          |                        |          |                    |          |             |          |                   |          |                  |          |            |          |  |
| Family history of brain tumors                   | 18         | 25       | 12              | 12       | 11                 | 11       | 1                     | 1        | 3           | 3        | 2                      | 1        | 1                  | 2        | 1           | 2        | 0                 | 2        | 0                | 1        | 2          | 1        |  |
| No family history of brain tumors                | 277        | 1203     | 140             | 600      | 115                | 490      | 25                    | 110      | 31          | 144      | 15                     | 74       | 16                 | 70       | 25          | 101      | 22                | 85       | 21               | 79       | 21         | 125      |  |
| Family history of neurological disorders         | 31         | 275      | 10              | 131      | 6                  | 114      | 4                     | 17       | 3           | 37       | 1                      | 14       | 2                  | 23       | 8           | 25       | 7                 | 23       | 1                | 23       | 0          | 12       |  |
| No family history of neurological disorders      | 263        | 954      | 143             | 481      | 121                | 387      | 22                    | 94       | 31          | 109      | 16                     | 61       | 15                 | 48       | 18          | 78       | 15                | 64       | 20               | 57       | 21         | 114      |  |
| Family history of stroke                         | 48         | 174      | 19              | 80       | 14                 | 63       | 5                     | 17       | 4           | 18       | 2                      | 3        | 2                  | 15       | 7           | 12       | 5                 | 12       | 4                | 11       | 4          | 25       |  |
| No family history of stroke                      | 247        | 1073     | 135             | 549      | 114                | 451      | 21                    | 98       | 30          | 128      | 15                     | 72       | 15                 | 56       | 19          | 91       | 17                | 75       | 17               | 69       | 17         | 101      |  |
| Family history of cancer                         | 146        | 593      | 66              | 306      | 58                 | 248      | 8                     | 58       | 22          | 74       | 13                     | 35       | 9                  | 39       | 14          | 36       | 14                | 27       | 8                | 42       | 12         | 73       |  |
| No family history of cancer                      | 152        | 635      | 88              | 306      | 70                 | 253      | 18                    | 53       | 13          | 71       | 5                      | 40       | 8                  | 31       | 12          | 67       | 8                 | 60       | 13               | 38       | 10         | 53       |  |
| Presenting Symptoms                              |            |          |                 |          |                    |          |                       |          |             |          |                        |          |                    |          |             |          |                   |          |                  |          |            |          |  |
| Headaches                                        | 128        | 562      | 67              | 280      | 57                 | 221      | 10                    | 59       | 13          | 71       | 6                      | 40       | 7                  | 31       | 7           | 47       | 5                 | 39       | 13               | 43       | 10         | 43       |  |
| No headaches                                     | 145        | 674      | 79              | 332      | 69                 | 277      | 10                    | 55       | 19          | 78       | 12                     | 39       | 7                  | 39       | 11          | 56       | 9                 | 48       | 6                | 43       | 15         | 81       |  |
| DNI                                              | 106        | 459      | 61              | 211      | 52                 | 164      | 9                     | 47       | 2           | 62       | 1                      |          |                    |          |             |          |                   |          |                  |          |            |          |  |

Supplementary Table 2a: multivariable logistic regression analysis for all tumors and meningiomas.

|                                   | All tumors                    |                                  | All meningiomas               |                                | Benign meningiomas              |                                | Malignant meningiomas                  |                                |
|-----------------------------------|-------------------------------|----------------------------------|-------------------------------|--------------------------------|---------------------------------|--------------------------------|----------------------------------------|--------------------------------|
|                                   | Unadjusted odds (95% CI)      | Adjusted odds (95% CI)           | Unadjusted odds (95% CI)      | Adjusted odds (95% CI)         | Unadjusted odds (95% CI)        | Adjusted odds (95% CI)         | Unadjusted odds (95% CI)               | Adjusted odds (95% CI)         |
| Median household income           | 1.00 (1.00, 1.00),<br>P=0.86  |                                  | 1.00 (1.00, 1.00),<br>P=0.99  |                                | 1.00 (1.00, 1.00),<br>P=0.26    |                                | 1.00 (1.00, 1.00),<br>P=0.025          |                                |
| Overall poverty level             | 0.85 (0.06, 12.76),<br>P=0.91 |                                  | 1.02 (0.02, 62.59),<br>P=0.99 |                                | 7.29 (0.10, 513.92),<br>P=0.36  |                                | 3.07 10–9 (0.00, 0.29),<br>P=0.037     |                                |
| Poverty level ages 18-64          | 1.20 (0.07, 19.59),<br>P=0.9  |                                  | 1.34 (0.02, 94.85),<br>P=0.89 |                                | 10.26 (0.12, 866.89),<br>P=0.30 |                                | 1.63 10–8 (0.00, 1.01),<br>P=0.05      |                                |
| Poverty level 65 and older        | 0.16 (0.01, 3.48),<br>P=0.24  | 20.64 (0.15, 2850.31),<br>P=0.23 | 0.31 (0.00, 31.95),<br>P=0.62 |                                | 7.14 (0.06, 904.29),<br>P=0.43  |                                | 7.44 10–15<br>(0.00, 0.01),<br>P=0.017 |                                |
| Geographic origin population size | 1.00 (1.00, 1.00),<br>P=0.22  |                                  | 1.00 (1.00, 1.00),<br>P=0.9   |                                | 1.00 (1.00, 1.00),<br>P=0.28    |                                | 1.00 (1.00, 1.00),<br>P=0.021          |                                |
| Geographic origin                 |                               |                                  |                               |                                |                                 |                                |                                        |                                |
| Urban                             | Referent                      | Referent                         | Referent                      | Referent                       | Referent                        | Referent                       | Referent                               | Referent                       |
| Suburban                          | 0.79 (0.61, 1.01),<br>P=0.065 | 0.71 (0.46, 1.11),<br>P=0.13     | 0.84 (0.58, 1.20),<br>P=0.33  |                                | 1.09 (0.73, 1.62),<br>P=0.67    |                                | 0.16 (0.05, 0.56),<br>P=0.004          | 0.21 (0.04, 1.13),<br>P=0.069  |
| Rural                             | 0.61 (0.14, 2.75),<br>P=0.52  | 3.08 (0.56, 17.07),<br>P=0.20    | 1.51 (0.29, 7.91),<br>P=0.62  |                                | 2.81 (0.46, 17.12),<br>P=0.26   |                                | 0.01 (3.75 10–6, 15.91),<br>P=0.99     | 0.60 (0.01, 50.16),<br>P=0.99  |
| Marital status                    |                               |                                  |                               |                                |                                 |                                |                                        |                                |
| Married                           | Referent                      | Referent                         | Referent                      | Referent                       | Referent                        | Referent                       | Referent                               | Referent                       |
| Divorced/separated                | 0.75 (0.51, 1.115),<br>P=0.16 | 0.55 (0.28, 1.06),<br>P=0.076    | 0.84 (0.50, 1.43),<br>P=0.52  |                                | 0.62 (0.33, 1.16),<br>P=0.14    |                                | 2.49 (0.84, 7.39),<br>P=0.10           |                                |
| Single                            | 0.84 (0.62, 1.14),<br>P=0.25  | 1.04 (0.64, 1.71),<br>P=0.86     | 1.22 (0.79, 1.89),<br>P=0.37  |                                | 1.26 (0.78, 2.02),<br>P=0.35    |                                | 1.03 (0.33, 3.20),<br>P=0.97           |                                |
| Widowed                           | 1.38 (0.89, 2.13),<br>P=0.15  | 1.70 (0.89, 3.23),<br>P=0.11     | 1.17 (0.63, 2.18),<br>P=0.63  |                                | 1.10 (0.54, 2.26),<br>P=0.80    |                                | 1.52 (0.43, 5.43),<br>P=0.52           |                                |
| Insurance                         |                               |                                  |                               |                                |                                 |                                |                                        |                                |
| Private                           | Referent                      | Referent                         | Referent                      | Referent                       | Referent                        | Referent                       | Referent                               | Referent                       |
| Medicaid                          | 1.38 (0.98, 1.95),<br>P=0.062 |                                  | 1.45 (0.86, 2.44),<br>P=0.17  |                                | 1.48 (0.84, 2.60),<br>P=0.18    |                                | 1.31 (0.32, 5.40),<br>P=0.71           |                                |
| Medicare                          | 2.02 (1.51, 2.70),<br>P<0.001 |                                  | 2.74 (1.80, 4.18),<br>P<0.001 |                                | 2.93 (1.85, 4.65),<br>P<0.001   |                                | 2.35 (0.80, 6.96),<br>P=0.12           |                                |
| Military                          | 1.22 (0.71, 2.09),<br>P=0.48  |                                  | 1.31 (0.62, 2.79),<br>P=0.48  |                                | 1.13 (0.47, 2.72),<br>P=0.78    |                                | 2.16 (0.44, 10.63),<br>P=0.34          |                                |
| Income quartiles                  |                               |                                  |                               |                                |                                 |                                |                                        |                                |
| Third quartile (middle class)     | Referent                      | Referent                         | Referent                      | Referent                       | Referent                        | Referent                       | Referent                               | Referent                       |
| First quartile                    | 1.08 (0.77, 1.53),<br>P=0.65  |                                  | 0.92 (0.56, 1.51),<br>P=0.74  |                                | 1.19 (0.70, 2.04),<br>P=0.52    |                                | 0.11 (0.01, 0.90),<br>P=0.039          |                                |
| Second quartile                   | 0.89 (0.62, 1.28),<br>P=0.53  |                                  | 0.80 (0.48, 1.33),<br>P=0.39  |                                | 1.00 (0.57, 1.74),<br>P=0.99    |                                | 0.27 (0.07, 1.05),<br>P=0.059          |                                |
| Fourth quartile                   | 1.18 (0.86, 1.63),<br>P=0.31  |                                  | 0.89 (0.57, 1.39),<br>P=0.61  |                                | 0.86 (0.51, 1.46),<br>P=0.58    |                                | 0.90 (0.36, 2.22),<br>P=0.81           |                                |
| Presenting symptoms               |                               |                                  |                               |                                |                                 |                                |                                        |                                |
| Headache                          |                               |                                  |                               |                                |                                 |                                |                                        |                                |
| No headache                       | Referent                      | Referent                         | Referent                      | Referent                       | Referent                        | Referent                       | Referent                               | Referent                       |
| Headache                          | 1.06 (0.81, 1.38),<br>P=0.67  |                                  | 1.01 (0.70, 1.44),<br>P=0.98  |                                | 1.04 (0.70, 1.53),<br>P=0.86    |                                | 0.93 (0.36, 2.41),<br>P=0.89           |                                |
| DNV                               |                               |                                  |                               |                                |                                 |                                |                                        |                                |
| No DNV                            | Referent                      | Referent                         | Referent                      | Referent                       | Referent                        | Referent                       | Referent                               | Referent                       |
| DNV                               | 1.08 (0.83, 1.42),<br>P=0.57  |                                  | 1.35 (0.93, 1.95),<br>P=0.11  | 1.60 (0.95, 2.70),<br>P=0.080  | 1.41 (0.94, 2.10),<br>P=0.094   | 2.52 (1.25, 5.08),<br>P=0.010  | 1.18 (0.45, 3.08),<br>P=0.73           |                                |
| Cognitive difficulty              |                               |                                  |                               |                                |                                 |                                |                                        |                                |
| No cognitive difficulty           | Referent                      | Referent                         | Referent                      | Referent                       | Referent                        | Referent                       | Referent                               | Referent                       |
| Cognitive difficulty              | 1.53 (1.16, 2.02),<br>P=0.003 | 0.85 (0.53, 1.35),<br>P=0.49     | 1.32 (0.90, 1.94),<br>P=0.16  |                                | 1.08 (0.70, 1.68),<br>P=0.72    |                                | 3.41 (1.36, 8.56),<br>P=0.009          | 1.38 (0.42, 4.55),<br>P=0.60   |
| Gait/coordination dysfunction     |                               |                                  |                               |                                |                                 |                                |                                        |                                |
| No gait/coordination dysfunction  | Referent                      | Referent                         | Referent                      | Referent                       | Referent                        | Referent                       | Referent                               | Referent                       |
| Gait/coordination dysfunction     | 1.16 (0.89, 1.51),<br>P=0.28  |                                  | 1.13 (0.79, 1.63),<br>P=0.50  |                                | 1.14 (0.77, 1.69),<br>P=0.51    |                                | 1.04 (0.41, 2.66),<br>P=0.94           |                                |
| Seizures/epilepsy                 |                               |                                  |                               |                                |                                 |                                |                                        |                                |
| No seizures/epilepsy              | Referent                      | Referent                         | Referent                      | Referent                       | Referent                        | Referent                       | Referent                               | Referent                       |
| Seizures/epilepsy                 | 3.05 (2.24, 4.15),<br>P<0.001 | 2.73 (1.64, 4.56),<br>P<0.001    | 3.25 (2.05, 5.15),<br>P<0.001 | 3.88 (1.98, 7.60),<br>P<0.001  | 2.65 (1.53, 4.58),<br>P<0.001   | 4.36 (1.78, 10.65),<br>P<0.001 | 6.93 (2.71, 17.75),<br>P<0.001         | 8.25 (2.49, 27.33),<br>P<0.001 |
| Sleep disturbances                |                               |                                  |                               |                                |                                 |                                |                                        |                                |
| No sleep disturbances             | Referent                      | Referent                         | Referent                      | Referent                       | Referent                        | Referent                       | Referent                               | Referent                       |
| Sleep disturbances                | 0.77 (0.59, 1.01),<br>P=0.056 | 0.62 (0.41, 0.95),<br>P=0.026    | 0.77 (0.53, 1.11),<br>P=0.16  | 0.83 (0.49, 1.41),<br>P=0.48   | 0.67 (0.45, 1.01),<br>P=0.058   | 0.61 (0.30, 1.25),<br>P=0.18   | 1.34 (0.55, 3.29),<br>P=0.52           |                                |
| Medical comorbidities             |                               |                                  |                               |                                |                                 |                                |                                        |                                |
| BMI                               |                               |                                  |                               |                                |                                 |                                |                                        |                                |
| BMI                               | 1.00 (0.99, 1.00),<br>P=0.73  |                                  | 1.01 (0.98, 1.04),<br>P=0.53  |                                | 1.01 (0.98, 1.04),<br>P=0.37    |                                | 0.98 (0.90, 1.05),<br>P=0.53           |                                |
| Weight class                      |                               |                                  |                               |                                |                                 |                                |                                        |                                |
| Normal                            | Referent                      | Referent                         | Referent                      | Referent                       | Referent                        | Referent                       | Referent                               | Referent                       |
| Underweight                       | 0.86 (0.37, 1.96),<br>P=0.72  | 1.04 (0.33, 3.28),<br>P=0.95     | 0.94 (0.31, 2.86),<br>P=0.92  | 0.83 (0.16, 4.26),<br>P=0.82   | 0.25 (0.03, 1.90),<br>P=0.18    | 0.66 (0.13, 3.36),<br>P=0.99   | 9.86 (1.39, 69.83),<br>P=0.022         |                                |
| Pre-obesity                       | 1.35 (0.99, 1.85),<br>P=0.061 | 1.17 (0.73, 1.87),<br>P=0.52     | 1.46 (0.94, 2.28),<br>P=0.093 | 1.42 (0.77, 2.64),<br>P=0.27   | 1.56 (0.96, 2.54),<br>P=0.07    | 1.74 (0.78, 3.85),<br>P=0.17   | 1.07 (0.35, 3.30),<br>P=0.91           |                                |
| Obesity class I                   | 1.29 (0.87, 1.91),<br>P=0.21  | 1.86 (1.04, 3.33),<br>P=0.038    | 1.46 (0.85, 2.52),<br>P=0.17  | 2.67 (1.28, 5.57),<br>P=0.009  | 1.35 (0.74, 2.48),<br>P=0.33    | 2.87 (1.08, 7.67),<br>P=0.035  | 2.05 (0.57, 7.39),<br>P=0.27           |                                |
| Obesity class II                  | 0.73 (0.41, 1.31),<br>P=0.29  | 0.56 (0.21, 1.51),<br>P=0.25     | 0.82 (0.36, 1.84),<br>P=0.63  | 1.02 (0.31, 3.35),<br>P=0.97   | 0.97 (0.42, 2.23),<br>P=0.94    | 1.09 (0.24, 4.96),<br>P=0.91   | 0.56 (0.06, 5.06),<br>P=0.99           |                                |
| Obesity class III                 | 1.14 (0.63, 2.04),<br>P=0.66  | 0.65 (0.23, 1.84),<br>P=0.41     | 1.36 (0.59, 3.14),<br>P=0.47  | 1.69 (0.50, 5.69),<br>P=0.39   | 1.26 (0.51, 3.09),<br>P=0.62    | 1.47 (0.28, 7.78),<br>P=0.65   | 2.19 (0.20, 24.12),<br>P=0.52          |                                |
| Type 2 diabetes mellitus          |                               |                                  |                               |                                |                                 |                                |                                        |                                |
| No diabetes mellitus              | Referent                      | Referent                         | Referent                      | Referent                       | Referent                        | Referent                       | Referent                               | Referent                       |
| Diabetes mellitus                 | 1.12 (0.80, 1.56),<br>P=0.51  |                                  | 1.14 (0.73, 1.80),<br>P=0.56  |                                | 1.21 (0.74, 1.99),<br>P=0.45    |                                | 0.85 (0.27, 2.72),<br>P=0.79           |                                |
| Hypertension                      |                               |                                  |                               |                                |                                 |                                |                                        |                                |
| No hypertension                   | Referent                      | Referent                         | Referent                      | Referent                       | Referent                        | Referent                       | Referent                               | Referent                       |
| Hypertension                      | 1.41 (1.10, 1.80),<br>P=0.007 |                                  | 1.54 (1.09, 2.19),<br>P=0.015 |                                | 1.54 (1.05, 2.27),<br>P=0.029   | 1.65 (0.83, 3.30),<br>P=0.15   | 1.55 (0.69, 3.50),<br>P=0.29           |                                |
| CAD or Prior MI                   |                               |                                  |                               |                                |                                 |                                |                                        |                                |
| No CAD/MI                         | Referent                      | Referent                         | Referent                      | Referent                       | Referent                        | Referent                       | Referent                               | Referent                       |
| CAD/MI                            | 0.95 (0.60, 1.53),<br>P=0.85  |                                  | 0.90 (0.45, 1.77),<br>P=0.75  |                                | 1.12 (0.54, 2.32),<br>P=0.76    |                                | 0.29 (0.04, 2.34),<br>P=0.25           |                                |
| PVD                               |                               |                                  |                               |                                |                                 |                                |                                        |                                |
| No PVD                            | Referent                      | Referent                         | Referent                      | Referent                       | Referent                        | Referent                       | Referent                               | Referent                       |
| PVD                               | 1.96 (0.88, 4.37),<br>P=0.10  |                                  | 2.03 (0.50, 8.22),<br>P=0.32  |                                | 1.61 (0.31, 8.39),<br>P=0.57    |                                | 4.25 (0.26, 70.04),<br>P=0.31          |                                |
| Stroke                            |                               |                                  |                               |                                |                                 |                                |                                        |                                |
| No stroke                         | Referent                      | Referent                         | Referent                      | Referent                       | Referent                        | Referent                       | Referent                               | Referent                       |
| Stroke                            | 1.31 (0.92, 1.87),<br>P=0.13  | 1.29 (0.75, 2.24),<br>P=0.36     | 1.60 (0.99, 2.59),<br>P=0.056 | 1.61 (0.80, 3.23),<br>P=0.18   | 1.74 (1.00, 3.00),<br>P=0.049   | 3.05 (1.31, 7.08),<br>P=0.009  | 1.24 (0.45, 3.42),<br>P=0.68           |                                |
| History of Afib or flutter        |                               |                                  |                               |                                |                                 |                                |                                        |                                |
| No Afib                           | Referent                      | Referent                         | Referent                      | Referent                       | Referent                        | Referent                       | Referent                               | Referent                       |
| Afib                              | 1.16 (0.67, 2.03),<br>P=0.59  |                                  | 1.36 (0.65, 2.85),<br>P=0.41  |                                | 1.98 (0.91, 4.32),<br>P=0.086   |                                | 0.01 (6.23 10–5, 2.31),<br>P=0.99      |                                |
| CHF                               |                               |                                  |                               |                                |                                 |                                |                                        |                                |
| No CHF                            | Referent                      | Referent                         | Referent                      | Referent                       | Referent                        | Referent                       | Referent                               | Referent                       |
| CHF                               | 1.34 (0.67, 2.67),<br>P=0.41  |                                  | 1.95 (0.83, 4.62),<br>P=0.13  | 4.24 (1.26, 14.21),<br>P=0.019 | 2.24 (0.87, 5.73),<br>P=0.093   | 6.64 (1.39, 31.73),<br>P=0.018 | 1.04 (0.11, 9.63),<br>P=0.98           |                                |
| CVR                               |                               |                                  |                               |                                |                                 |                                |                                        |                                |
| No CVR                            | Referent                      | Referent                         | Referent                      | Referent                       | Referent                        | Referent                       | Referent                               | Referent                       |
| CVR                               | 1.76 (0.45, 6.83),<br>P=0.42  |                                  |                               | 0.01 (3.74 10–4, 0.36), P=0.98 |                                 | 0.01 (1.74 10–4, 0.64), P=0.98 | 0.01 (2.83 10–5, 4.04),<br>P=0.99      |                                |
| History of head trauma            |                               |                                  |                               |                                |                                 |                                |                                        |                                |
| No history of head trauma         | Referent                      | Referent                         | Referent                      | Referent                       | Referent                        | Referent                       | Referent                               | Referent                       |
| History of head trauma            | 0.56 (0.37, 0.84),<br>P=0.006 | 0.59 (0.30, 1.18),<br>P=0.13     | 0.66 (0.36, 1.19),<br>P=0.17  | 1.12 (0.50, 2.50),<br>P=0.79   | 0.82 (0.44, 1.51),<br>P=0.52    |                                | 0.01 (5.77 10–5, 2.38),<br>P=0.99      |                                |
| History of cancer/neoplasm        |                               |                                  |                               |                                |                                 |                                |                                        |                                |
| No history of cancer/neoplasm     | Referent                      | Referent                         | Referent                      | Referent                       | Referent                        | Referent                       | Referent                               | Referent                       |
| History of cancer/neoplasm        | 2.80 (2.10, 3.71),<br>P<0.001 | 2.90 (1.84, 4.58),<br>P<0.001    | 2.26 (1.49, 3.43),<br>P<0.001 | 2.69 (1.50, 4.82),<br>P<0.001  | 1.81 (1.12, 2.92),<br>P=0.015   | 2.26 (1.06, 4.81),<br>P=0.035  | 5.23 (2.12, 12.89),<br>P<0.001         | 3.94 (1.12, 13.86),<br>P=0.032 |
| OSA                               |                               |                                  |                               |                                |                                 |                                |                                        |                                |
| No OSA                            | Referent                      | Referent                         | Referent                      | Referent                       | Referent                        | Referent                       | Referent                               | Referent                       |
| OSA                               | 1.04 (0.66, 1.62),<br>P=0.88  |                                  | 0.87 (0.43, 1.76),<br>P=0.69  |                                | 0.72 (0.31, 1.66),<br>P=0.44    |                                | 1.62 (0.40, 6.51),<br>P=0.50           |                                |
| Asthma/COPD                       |                               |                                  |                               |                                |                                 |                                |                                        |                                |
| No asthma/COPD                    | Referent                      | Referent                         | Referent                      | Referent                       | Referent                        | Referent                       | Referent                               | Referent                       |
| Asthma/COPD                       | 0.81 (0.57, 1.16),<br>P=0.25  |                                  | 0.65 (0.38, 1.11),<br>P=0.11  | 0.44 (0.20, 0.98),<br>P=0.044  | 0.60 (0.33, 1.07),<br>P=0.083   | 0.37 (0.13, 1.05),<br>P=0.062  | 1.04 (0.27, 3.95),<br>P=0.96           |                                |
| GERD                              |                               |                                  |                               |                                |                                 |                                |                                        |                                |
| No GERD                           | Referent                      | Referent                         | Referent                      | Referent                       | Referent                        | Referent                       | Referent                               | Referent                       |
| GERD                              | 0.48 (0.28, 0.82),<br>P=0.007 |                                  | 0.56 (0.28, 1.12),<br>P=0.10  |                                | 0.60 (0.28, 1.30),<br>P=0.20    |                                | 0.45 (0.10, 2.06),<br>P=0.30           |                                |
| Diverticular disease              |                               |                                  |                               |                                |                                 |                                |                                        |                                |
| No diverticular disease           | Referent                      | Referent                         | Referent                      | Referent                       | Referent                        | Referent                       | Referent                               | Referent                       |
| Diverticular disease              | 2.10 (1.11, 3.95),<br>P=0.022 | 2.88 (0.94, 8.76),<br>P=0.063    | 2.34 (1.01, 5.40),<br>P=0.046 | 3.20 (0.96, 10.71),<br>P=0.059 | 2.56 (1.04, 6.31),<br>P=0.041   | 3.70 (0.80, 17.18),<br>P=0.095 | 1.39 (0.14, 13.90),<br>P=0.78          |                                |
| Autoimmune disease                |                               |                                  |                               |                                |                                 |                                |                                        |                                |
| No autoimmune disease             | Referent                      | Referent                         | Referent                      | Referent                       | Referent                        | Referent                       | Referent                               | Referent                       |
| Autoimmune disease                | 0.97 (0.55, 1.69),<br>P=0.91  |                                  | 1.24 (0.60, 2.58),<br>P=0.56  |                                | 1.43 (0.65, 3.12),<br>P=0.38    |                                | 0.58 (0.07, 4.88),<br>P=0.61           |                                |



Supplementary Table 2b: Multivariable logistic regression analysis for gliomas.

|                                              | All Gliomas                                           |               | Gliomas (Grades I-III)                              |               | Gliomas (Grade IV)                                  |               |
|----------------------------------------------|-------------------------------------------------------|---------------|-----------------------------------------------------|---------------|-----------------------------------------------------|---------------|
|                                              | Unadjusted Odds (95% CI)                              | Adjusted Odds | Unadjusted Odds (95% CI)                            | Adjusted Odds | Unadjusted Odds (95% CI)                            | Adjusted Odds |
| Median household income                      | 1.00 (1.00, 1.00), <i>P</i> =0.31                     |               | 1.00 (1.00, 1.00), <i>P</i> =0.44                   |               | 1.00 (1.00, 1.00), <i>P</i> =0.51                   |               |
| Overall poverty level                        | 0.92 (2.0×10 <sup>-4</sup> , 4341.44), <i>P</i> =0.99 |               | 0.80 (0.00, 2.17×10 <sup>5</sup> ), <i>P</i> =0.97  |               | 1.04 (0.00, 1.06×10 <sup>5</sup> ), <i>P</i> =0.99  |               |
| Poverty level ages 18-64                     | 1.70 (2.7×10 <sup>-4</sup> , 10686), <i>P</i> =0.91   |               | 0.34 (0.00, 2.31×10 <sup>5</sup> ), <i>P</i> =0.88  |               | 6.01 (0.00, 6.26×10 <sup>5</sup> ), <i>P</i> =0.76  |               |
| Poverty level 65 and older                   | 0.61 (3.06×10 <sup>-5</sup> , 12032), <i>P</i> =0.92  |               | 0.02 (0.00, 5.44×10 <sup>5</sup> ), <i>P</i> =0.64  |               | 4.39 (0.00, 8.06×10 <sup>5</sup> ), <i>P</i> =0.81  |               |
| Geographic origin population size            | 1.00 (1.00, 1.00), <i>P</i> =0.39                     |               | 1.00 (1.00, 1.00), <i>P</i> =0.17                   |               | 1.00 (1.00, 1.00), <i>P</i> =0.77                   |               |
| Geographic origin                            | Referent                                              |               | Referent                                            |               | Referent                                            |               |
| Urban                                        | Referent                                              |               | Referent                                            |               | Referent                                            |               |
| Suburban                                     | 1.01 (0.50, 2.06), <i>P</i> =0.97                     |               | 0.74 (0.28, 1.98), <i>P</i> =0.55                   |               | 1.45 (0.52, 4.07), <i>P</i> =0.48                   |               |
| Rural                                        | 0.01 (1.13×10 <sup>-5</sup> , 9.86), <i>P</i> =0.99   |               | NA                                                  |               | 0.12 (4.35×10 <sup>-4</sup> , 34.3), <i>P</i> =0.99 |               |
| Marital status                               | Referent                                              |               | Referent                                            |               | Referent                                            |               |
| Married                                      | Referent                                              |               | Referent                                            |               | Referent                                            |               |
| Divorced/Separated                           | 0.46 (0.10, 2.18), <i>P</i> =0.33                     |               | 0.75 (0.14, 4.03), <i>P</i> =0.74                   |               | 0.31 (0.02, 4.53), <i>P</i> =0.99                   |               |
| Single                                       | 0.77 (0.35, 1.69), <i>P</i> =0.51                     |               | 0.35 (0.10, 1.20), <i>P</i> =0.10                   |               | 1.58 (0.52, 4.78), <i>P</i> =0.42                   |               |
| Widowed                                      | 1.85 (0.42, 8.06), <i>P</i> =0.41                     |               | 1.50 (0.13, 18.1), <i>P</i> =0.75                   |               | 2.38 (0.37, 15.3), <i>P</i> =0.36                   |               |
| Insurance                                    | Referent                                              |               | Referent                                            |               | Referent                                            |               |
| Private                                      | Referent                                              |               | Referent                                            |               | Referent                                            |               |
| Medicaid                                     | 0.72 (0.26, 1.97), <i>P</i> =0.53                     |               | 0.48 (0.12, 1.88), <i>P</i> =0.29                   |               | 1.29 (0.29, 5.77), <i>P</i> =0.74                   |               |
| Medicare                                     | 2.01 (0.87, 4.63), <i>P</i> =0.10                     |               | 2.39 (0.65, 8.75), <i>P</i> =0.19                   |               | 2.06 (0.65, 6.51), <i>P</i> =0.22                   |               |
| Military                                     | 0.72 (0.15, 3.51), <i>P</i> =0.69                     |               | 0.64 (0.07, 5.85), <i>P</i> =0.69                   |               | 0.86 (0.09, 8.27), <i>P</i> =0.89                   |               |
| Income quartiles                             | Referent                                              |               | Referent                                            |               | Referent                                            |               |
| Third quartile (middle class)                | Referent                                              |               | Referent                                            |               | Referent                                            |               |
| First quartile                               | 1.03 (0.43, 2.46), <i>P</i> =0.95                     |               | 0.75 (0.20, 2.79), <i>P</i> =0.66                   |               | 1.37 (0.41, 4.56), <i>P</i> =0.61                   |               |
| Second quartile                              | 0.66 (0.23, 1.85), <i>P</i> =0.43                     |               | 0.70 (0.19, 2.60), <i>P</i> =0.59                   |               | 0.57 (0.10, 3.15), <i>P</i> =0.52                   |               |
| Fourth quartile                              | 0.41 (0.14, 1.20), <i>P</i> =0.10                     |               | 0.27 (0.05, 1.35), <i>P</i> =0.11                   |               | 0.62 (0.14, 2.72), <i>P</i> =0.53                   |               |
| Presenting symptoms                          | Referent                                              |               | Referent                                            |               | Referent                                            |               |
| Headache                                     | Referent                                              |               | Referent                                            |               | Referent                                            |               |
| No headache                                  | Referent                                              |               | Referent                                            |               | Referent                                            |               |
| Headache                                     | 0.75 (0.35, 1.63), <i>P</i> =0.47                     |               | 0.49 (0.17, 1.43), <i>P</i> =0.19                   |               | 1.26 (0.40, 3.97), <i>P</i> =0.70                   |               |
| DNV                                          | Referent                                              |               | Referent                                            |               | Referent                                            |               |
| No DNV                                       | Referent                                              |               | Referent                                            |               | Referent                                            |               |
| DNV                                          | 0.10 (0.02, 0.43), <i>P</i> =0.002                    |               | 7.77 10 <sup>-4</sup> (0.00, 0.05), <i>P</i> <0.001 |               | 0.08 (0.01, 0.64), <i>P</i> =0.017                  |               |
| Cognitive difficulty                         | Referent                                              |               | Referent                                            |               | Referent                                            |               |
| No cognitive difficulty                      | Referent                                              |               | Referent                                            |               | Referent                                            |               |
| Cognitive difficulty                         | 5.87 (2.59, 13.33), <i>P</i> <0.001                   |               | 25.35 (3.48, 184.87), <i>P</i> =0.001               |               | 7.94 (2.54, 24.9), <i>P</i> <0.001                  |               |
| Gait/coordination dysfunction                | Referent                                              |               | Referent                                            |               | Referent                                            |               |
| No gait/coordination dysfunction             | Referent                                              |               | Referent                                            |               | Referent                                            |               |
| Gait/coordination dysfunction                | 1.58 (0.72, 3.47), <i>P</i> =0.26                     |               | 1.62 (0.54, 4.82), <i>P</i> =0.39                   |               | 1.55 (0.49, 4.89), <i>P</i> =0.45                   |               |
| Seizures/epilepsy                            | Referent                                              |               | Referent                                            |               | Referent                                            |               |
| No seizures/epilepsy                         | Referent                                              |               | Referent                                            |               | Referent                                            |               |
| Seizures/epilepsy                            | 10.66 (4.60, 24.70), <i>P</i> <0.001                  |               | 42.51 (4.04, 447.22), <i>P</i> =0.002               |               | 16.8 (4.88, 57.8), <i>P</i> <0.001                  |               |
| Sleep disturbances                           | Referent                                              |               | Referent                                            |               | Referent                                            |               |
| No sleep disturbances                        | Referent                                              |               | Referent                                            |               | Referent                                            |               |
| Sleep disturbances                           | 0.38 (0.15, 0.99), <i>P</i> =0.048                    |               | 0.38 (0.06, 2.22), <i>P</i> =0.28                   |               | 0.34 (0.09, 1.29), <i>P</i> =0.11                   |               |
| Medical comorbidities/conditions             | Referent                                              |               | Referent                                            |               | Referent                                            |               |
| BMI                                          | 1.00 (0.99, 1.01), <i>P</i> =0.77                     |               | 1.05 (0.97, 1.14), <i>P</i> =0.23                   |               | 0.99 (0.90, 1.10), <i>P</i> =0.87                   |               |
| Weight category                              | Referent                                              |               | Referent                                            |               | Referent                                            |               |
| Normal                                       | Referent                                              |               | Referent                                            |               | Referent                                            |               |
| Underweight                                  | 0.28 (0.007, 11.6), <i>P</i> =0.99                    |               | 0.72 (0.008, 63.3), <i>P</i> =1.00                  |               | NA                                                  |               |
| Pre-obesity                                  | 0.62 (0.24, 1.63), <i>P</i> =0.33                     |               | 0.19 (0.03, 1.24), <i>P</i> =0.083                  |               | 0.89 (0.27, 2.93), <i>P</i> =0.84                   |               |
| Obesity Class I                              | 0.53 (0.14, 2.05), <i>P</i> =0.36                     |               | 0.09 (0.007, 1.11), <i>P</i> =0.060                 |               | 0.46 (0.05, 4.18), <i>P</i> =0.49                   |               |
| Obesity Class II                             | 0.30 (0.01, 6.15), <i>P</i> =0.99                     |               | 0.37 (0.01, 13.1), <i>P</i> =1.00                   |               | 0.33 (0.001, 125), <i>P</i> =0.99                   |               |
| Obesity Class III                            | 2.21 (0.57, 8.55), <i>P</i> =0.25                     |               | 49.68 (1.59, 1550), <i>P</i> =0.026                 |               | 3.43 (0.62, 18.9), <i>P</i> =0.16                   |               |
| Type 2 diabetes mellitus                     | Referent                                              |               | Referent                                            |               | Referent                                            |               |
| No diabetes mellitus                         | Referent                                              |               | Referent                                            |               | Referent                                            |               |
| Diabetes mellitus                            | 0.52 (0.15, 1.84), <i>P</i> =0.31                     |               | 0.31 (0.04, 2.55), <i>P</i> =0.28                   |               | 0.79 (0.16, 3.93), <i>P</i> =0.77                   |               |
| Hypertension                                 | Referent                                              |               | Referent                                            |               | Referent                                            |               |
| No Hypertension                              | Referent                                              |               | Referent                                            |               | Referent                                            |               |
| Hypertension                                 | 1.30 (0.63, 2.71), <i>P</i> =0.48                     |               | 1.20 (0.40, 3.54), <i>P</i> =0.75                   |               | 1.51 (0.52, 4.37), <i>P</i> =0.45                   |               |
| CAD or Prior MI                              | Referent                                              |               | Referent                                            |               | Referent                                            |               |
| No CAD/MI                                    | Referent                                              |               | Referent                                            |               | Referent                                            |               |
| CAD/MI                                       | 0.46 (0.06, 3.78), <i>P</i> =0.47                     |               | 0.01 (0.00, 8.38), <i>P</i> =0.99                   |               | 0.73 (0.08, 6.49), <i>P</i> =0.78                   |               |
| PVD                                          | Referent                                              |               | Referent                                            |               | Referent                                            |               |
| No PVD                                       | Referent                                              |               | Referent                                            |               | Referent                                            |               |
| PVD                                          | 0.01 (2.34×10 <sup>-5</sup> , 5.08), <i>P</i> =0.99   |               | NA                                                  |               | 0.01 (1.11×10 <sup>-5</sup> , 11.3), <i>P</i> =0.99 |               |
| Stroke                                       | Referent                                              |               | Referent                                            |               | Referent                                            |               |
| No Stroke                                    | Referent                                              |               | Referent                                            |               | Referent                                            |               |
| Stroke                                       | 1.79 (0.64, 4.99), <i>P</i> =0.27                     |               | 3.79 (0.91, 15.8), <i>P</i> =0.068                  |               | 0.84 (0.17, 4.24), <i>P</i> =0.83                   |               |
| History of Afib or flutter                   | Referent                                              |               | Referent                                            |               | Referent                                            |               |
| No Afib                                      | Referent                                              |               | Referent                                            |               | Referent                                            |               |
| Afib                                         | 1.24 (0.25, 6.25), <i>P</i> =0.79                     |               | 0.01 (0.00, 8.38), <i>P</i> =0.99                   |               | 2.40 (0.40, 14.3), <i>P</i> =0.34                   |               |
| CHF                                          | Referent                                              |               | Referent                                            |               | Referent                                            |               |
| No CHF                                       | Referent                                              |               | Referent                                            |               | Referent                                            |               |
| CHF                                          | 0.01 (2.39×10 <sup>-5</sup> , 5.08), <i>P</i> =0.99   |               | NA                                                  |               | 0.01 (1.11×10 <sup>-5</sup> , 11.3), <i>P</i> =0.99 |               |
| CVR                                          | Referent                                              |               | Referent                                            |               | Referent                                            |               |
| No CVR                                       | Referent                                              |               | Referent                                            |               | Referent                                            |               |
| CVR                                          | Na                                                    |               | Na                                                  |               | Na                                                  |               |
| History of head trauma                       | Referent                                              |               | Referent                                            |               | Referent                                            |               |
| No history of head trauma                    | Referent                                              |               | Referent                                            |               | Referent                                            |               |
| History of head trauma                       | 0.50 (0.16, 1.52), <i>P</i> =0.22                     |               | 0.65 (0.17, 2.47), <i>P</i> =0.52                   |               | 0.30 (0.04, 2.42), <i>P</i> =0.26                   |               |
| History of cancer/neoplasm                   | Referent                                              |               | Referent                                            |               | Referent                                            |               |
| No History of cancer/neoplasm                | Referent                                              |               | Referent                                            |               | Referent                                            |               |
| History of cancer/neoplasm                   | 1.64 (0.64, 4.24), <i>P</i> =0.31                     |               | 2.82 (0.82, 9.68), <i>P</i> =0.1                    |               | 47.36 (0.30, 7583.19), <i>P</i> =0.14               |               |
| OSA                                          | Referent                                              |               | Referent                                            |               | Referent                                            |               |
| No OSA                                       | Referent                                              |               | Referent                                            |               | Referent                                            |               |
| OSA                                          | 0.61 (0.07, 5.10), <i>P</i> =0.65                     |               | 2.17 (0.19, 25.2), <i>P</i> =0.54                   |               | 0.01 (1.84×10 <sup>-5</sup> , 7.95), <i>P</i> =0.99 |               |
| Asthma/COPD                                  | Referent                                              |               | Referent                                            |               | Referent                                            |               |
| No Asthma/COPD                               | Referent                                              |               | Referent                                            |               | Referent                                            |               |
| Asthma/COPD                                  | 0.53 (0.15, 1.86), <i>P</i> =0.32                     |               | 1.69 (0.40, 7.07), <i>P</i> =0.47                   |               | 0.01 (1.32×10 <sup>-5</sup> , 10.5), <i>P</i> =0.99 |               |
| GERD                                         | Referent                                              |               | Referent                                            |               | Referent                                            |               |
| No GERD                                      | Referent                                              |               | Referent                                            |               | Referent                                            |               |
| GERD                                         | 0.45 (0.10, 2.04), <i>P</i> =0.30                     |               | 0.01 (0.00, 7.33), <i>P</i> =0.99                   |               | 1.13 (0.22, 5.89), <i>P</i> =0.88                   |               |
| Diverticular disease                         | Referent                                              |               | Referent                                            |               | Referent                                            |               |
| No diverticular disease                      | Referent                                              |               | Referent                                            |               | Referent                                            |               |
| Diverticular disease                         | 0.86 (0.10, 7.62), <i>P</i> =0.89                     |               | 0.01 (0.00, 8.53), <i>P</i> =0.99                   |               | 1.52 (0.15, 15.6), <i>P</i> =0.72                   |               |
| Autoimmune disease                           | Referent                                              |               | Referent                                            |               | Referent                                            |               |
| No autoimmune disease                        | Referent                                              |               | Referent                                            |               | Referent                                            |               |
| Autoimmune disease                           | 0.01 (1.32×10 <sup>-4</sup> , 1.25), <i>P</i> =0.99   |               | 0.01 (0.00, 7.13), <i>P</i> =0.99                   |               | 0.01 (1.93×10 <sup>-5</sup> , 7.84), <i>P</i> =0.99 |               |
| Thyroid disease                              | Referent                                              |               | Referent                                            |               | Referent                                            |               |
| No thyroid disease                           | Referent                                              |               | Referent                                            |               | Referent                                            |               |
| Thyroid disease                              | 0.80 (0.22, 2.89), <i>P</i> =0.73                     |               | 0.69 (0.08, 6.05), <i>P</i> =0.73                   |               | 0.88 (0.17, 4.45), <i>P</i> =0.88                   |               |
| Glaucoma                                     | Referent                                              |               | Referent                                            |               | Referent                                            |               |
| No glaucoma                                  | Referent                                              |               | Referent                                            |               | Referent                                            |               |
| Glaucoma                                     | 0.01 (7.55×10 <sup>-5</sup> , 1.81), <i>P</i> =0.99   |               | 0.01 (0.00, 11.1), <i>P</i> =0.99                   |               | 0.01 (1.44×10 <sup>-5</sup> , 8.80), <i>P</i> =0.99 |               |
| Social history and psychiatric risk factors  | Referent                                              |               | Referent                                            |               | Referent                                            |               |
| Smoking status                               | Referent                                              |               | Referent                                            |               | Referent                                            |               |
| Never smoker                                 | Referent                                              |               | Referent                                            |               | Referent                                            |               |
| Former smoker                                | 1.51 (0.63, 3.63), <i>P</i> =0.36                     |               | 1.41 (0.39, 5.02), <i>P</i> =0.60                   |               | 1.60 (0.47, 5.42), <i>P</i> =0.45                   |               |
| Current smoker                               | 0.97 (0.30, 3.13), <i>P</i> =0.96                     |               | 2.11 (0.48, 9.33), <i>P</i> =0.33                   |               | 0.37 (0.04, 3.15), <i>P</i> =0.36                   |               |
| Alcohol use screen (AUDIT-C)                 | Referent                                              |               | Referent                                            |               | Referent                                            |               |
| Negative alcohol screen                      | Referent                                              |               | Referent                                            |               | Referent                                            |               |
| Positive alcohol screen                      | 1.61 (0.59, 4.40), <i>P</i> =0.36                     |               | 2.09 (0.48, 9.00), <i>P</i> =0.32                   |               | 1.41 (0.34, 5.84), <i>P</i> =0.64                   |               |
| Alcohol use disorder                         | Referent                                              |               | Referent                                            |               | Referent                                            |               |
| No alcohol use disorder                      | Referent                                              |               | Referent                                            |               | Referent                                            |               |
| Alcohol use disorder                         | 0.01 (1.27×10 <sup>-4</sup> , 1.38), <i>P</i> =0.99   |               | 0.01 (0.00, 7.24), <i>P</i> =0.99                   |               | 0.01 (1.67×10 <sup>-5</sup> , 8.72), <i>P</i> =0.99 |               |
| Depression screen (PHQ-2)                    | Referent                                              |               | Referent                                            |               | Referent                                            |               |
| Negative PHQ-2                               | Referent                                              |               | Referent                                            |               | Referent                                            |               |
| Positive PHQ-2                               | 0.85 (0.18, 4.04), <i>P</i> =0.84                     |               | 0.63 (0.07, 5.54), <i>P</i> =0.67                   |               | 1.23 (0.13, 11.6), <i>P</i> =0.86                   |               |
| PHQ-9 score                                  | 0.99 (0.86, 1.15), <i>P</i> =0.91                     |               | 0.94 (0.74, 1.19), <i>P</i> =0.60                   |               | 1.71 (0.21, 14.3), <i>P</i> =1.00                   |               |
| Depression                                   | Referent                                              |               | Referent                                            |               | Referent                                            |               |
| No depression                                | Referent                                              |               | Referent                                            |               | Referent                                            |               |
| Depression                                   | 1.12 (0.48, 2.61), <i>P</i> =0.79                     |               | 1.17 (0.40, 3.48), <i>P</i> =0.77                   |               | 1.02 (0.26, 4.07), <i>P</i> =0.98                   |               |
| Psychiatric disorders (Excluding Depression) | Referent                                              |               | Referent                                            |               | Referent                                            |               |
| No psychiatric disorders                     | Referent                                              |               | Referent                                            |               | Referent                                            |               |
| Psychiatric disorders                        | 0.80 (0.32, 1.98), <i>P</i> =0.63                     |               | 1.02 (0.33, 3.19), <i>P</i> =0.98                   |               | 0.52 (0.11, 2.55), <i>P</i> =0.42                   |               |
| Family history                               | Referent                                              |               | Referent                                            |               | Referent                                            |               |
| Family history of brain tumors               | Referent                                              |               | Referent                                            |               | Referent                                            |               |
| No family history of brain tumors            | Referent                                              |               | Referent                                            |               | Referent                                            |               |
| Family history of brain tumors               | 4.65 (0.90, 24.11), <i>P</i> =0.068                   |               | 17.5 (0.53, 578), <i>P</i> =0.11                    |               | 9.87 (0.84, 116), <i>P</i> =0.069                   |               |
| Family history of neurological disease       | Referent                                              |               | Referent                                            |               | Referent                                            |               |
| No family history of neurological disease    | Referent                                              |               | Referent                                            |               | Referent                                            |               |
| Family history of neurological disease       | 0.29 (0.08, 0.99), <i>P</i> =0.048                    |               | 0.06 (0.00, 1.06), <i>P</i> =0.007                  |               | 1.54 (0.07, 34.6), <i>P</i> =1.00                   |               |
| Family history of stroke                     | Referent                                              |               | Referent                                            |               | Referent                                            |               |
| No family history of stroke                  | Referent                                              |               | Referent                                            |               | Referent                                            |               |
| Family history of stroke                     | 0.95 (0.30, 3.01), <i>P</i> =0.93                     |               | 3.20 (0.49, 20.8), <i>P</i> =0.22                   |               | 0.58 (0.02, 16.2), <i>P</i> =1.00                   |               |
| Family history of cancer                     | Referent                                              |               | Referent                                            |               | Referent                                            |               |
| No family history of cancer                  | Referent                                              |               | Referent                                            |               | Referent                                            |               |
| Family history of cancer                     | 1.62 (0.76, 3.47), <i>P</i> =0.21                     |               | 22.6 (2.40, 213), <i>P</i> =0.006                   |               | 2.97 (0.96, 9.17), <i>P</i> =0.058                  |               |
|                                              |                                                       |               | 37.90 (1.05, 1373.58), <i>P</i> =0.047              |               | 0.89 (0.31, 2.59), <i>P</i> =0.84                   |               |

DNV: Dizziness, nausea, or vomiting; BMI: Body mass index; Afib: Atrial fibrillation or flutter; CHF: Congestive heart failure; CAD/MI: Coronary artery disease/myocardial infarction; PVD: Peripheral vascular disease; CVR: Cardiac valve replacement; OSA: Obstructive sleep apnea; GERD: Gastroesophageal reflux disease; AUDIT-C: Alcohol Use Disorders Identification Test-Consumption; IQR: Interquartile range; CI: Confidence interval; PHQ: Patient health questionnaire

Supplementary Table 2c: Multivariable logistic regression analysis for schwannomas, acoustic neuromas, pituitary tumors, and metastases.

|                                   | Schwannomas (Entire CNS)                   |                                       | Vestibular Schwannomas                    |                                       | Pituitary Adenomas                      |                                        | Metastases                                |                                          |
|-----------------------------------|--------------------------------------------|---------------------------------------|-------------------------------------------|---------------------------------------|-----------------------------------------|----------------------------------------|-------------------------------------------|------------------------------------------|
|                                   | Unadjusted Odds (95% CI)                   | Adjusted Odds                         | Unadjusted Odds (95% CI)                  | Adjusted Odds                         | Unadjusted Odds (95% CI)                | Adjusted Odds                          | Unadjusted Odds (95% CI)                  | Adjusted Odds                            |
| Median household income           | 1.00 (1.00, 1.00), <i>P</i> =0.15          |                                       | 1.00 (1.00, 1.00), <i>P</i> =0.29         |                                       | 1.00 (1.00, 1.00), <i>P</i> =0.445      |                                        | 1.00 (1.00, 1.00), <i>P</i> =0.12         |                                          |
| Overall poverty level             | 0.03 (0.00, 710.59), <i>P</i> =0.48        |                                       | 0.09 (0.00, 1345.67), <i>P</i> =0.62      |                                       | 127.42 (0.00, 468106), <i>P</i> =0.37   |                                        | 0.010 (0.00, 2303.04), <i>P</i> =0.47     |                                          |
| Poverty level ages 18-64          | 0.04 (0.00, 1059.50), <i>P</i> =0.53       |                                       | 0.12 (0.00, 1867.06), <i>P</i> =0.67      |                                       | 850.31 (0.01, 4.90 107), <i>P</i> =0.23 |                                        | 0.01 (0.00, 3772.86), <i>P</i> =0.49      |                                          |
| Poverty level 65 and older        | 0.01 (0.00, 162.77), <i>P</i> =0.32        |                                       | 0.02 (0.00, 527.03), <i>P</i> =0.46       |                                       | 46.24 (0.00, 458 106), <i>P</i> =0.51   |                                        | 3.1710-10 (0.00, 0.38), <i>P</i> =0.040   | 4.9410-5 (0.00, 8.66107), <i>P</i> =0.49 |
| Geographic origin population size | 0.01 (0.00, 162.77), <i>P</i> =0.32        |                                       | 0.02 (0.00, 527.03), <i>P</i> =0.46       |                                       | 46.24 (0.00, 458 106), <i>P</i> =0.51   |                                        | 3.1710-10 (0.00, 0.38), <i>P</i> =0.040   | 4.9410-5 (0.00, 8.66107), <i>P</i> =0.49 |
| Geographic origin                 |                                            |                                       |                                           |                                       |                                         |                                        |                                           |                                          |
| Urban                             | Referent                                   |                                       | Referent                                  |                                       | Referent                                |                                        | Referent                                  |                                          |
| Suburban                          | 0.46 (0.18, 1.18), <i>P</i> =0.11          |                                       | 0.48 (0.18, 1.29), <i>P</i> =0.14         | 0.16 (0.03, 1.00), <i>P</i> =0.051    | 0.76 (0.28, 2.07), <i>P</i> =0.60       |                                        | 0.49 (0.22, 1.13), <i>P</i> =0.094        | 0.32 (0.04, 2.35), <i>P</i> =0.26        |
| Rural                             | 0.009 (0.00, 30.14), <i>P</i> =0.99        |                                       | 0.009 (0.00, 59.73), <i>P</i> =0.99       | 0.09 (0.00, 56.23), <i>P</i> =1.00    | 0.01 (0.00, 26.01), <i>P</i> =0.99      |                                        | 0.009 (0.00, 12.98), <i>P</i> =0.99       |                                          |
| Marital status                    |                                            |                                       |                                           |                                       |                                         |                                        |                                           |                                          |
| Married                           | Referent                                   |                                       | Referent                                  |                                       | Referent                                |                                        | Referent                                  |                                          |
| Divorced/Separated                | 0.48 (0.12, 1.85), <i>P</i> =0.29          |                                       | 0.47 (0.12, 1.89), <i>P</i> =0.29         |                                       | 0.21 (0.02, 1.80), <i>P</i> =0.15       | 0.51 (0.097, 2.72), <i>P</i> =1.00     | 0.72 (0.21, 2.45), <i>P</i> =0.60         |                                          |
| Single                            | 0.65 (0.23, 1.87), <i>P</i> =0.43          |                                       | 0.54 (0.17, 1.70), <i>P</i> =0.29         |                                       | 0.32 (0.10, 0.98), <i>P</i> =0.05       | 0.032 (0.00, 0.80), <i>P</i> =0.036    | 1.07 (0.36, 3.17), <i>P</i> =0.91         |                                          |
| Widowed                           | 2.24 (0.34, 14.76), <i>P</i> =0.40         |                                       | 1.00 (0.09, 10.54), <i>P</i> =1.00        |                                       | 2.54 (0.45, 14.26), <i>P</i> =0.29      | 37.09 (0.24, 5717.01), <i>P</i> =0.16  | 0.72 (0.25, 2.04), <i>P</i> =0.53         |                                          |
| Insurance                         |                                            |                                       |                                           |                                       |                                         |                                        |                                           |                                          |
| Private                           | Referent                                   |                                       | Referent                                  |                                       | Referent                                |                                        | Referent                                  |                                          |
| Medicaid                          | 0.82 (0.28, 2.41), <i>P</i> =0.71          |                                       | 0.91 (0.29, 2.86), <i>P</i> =0.88         |                                       | 1.08 (0.30, 3.85), <i>P</i> =0.91       | 2.70 (0.11, 64.13), <i>P</i> =0.54     | 2.53 (0.77, 8.32), <i>P</i> =0.13         |                                          |
| Medicare                          | 0.79 (0.27, 2.31), <i>P</i> =0.66          |                                       | 0.67 (0.21, 2.21), <i>P</i> =0.51         |                                       | 2.67 (0.74, 9.57), <i>P</i> =0.13       | 5.10 (0.22, 119.19), <i>P</i> =0.31    | 1.62 (0.60, 4.38), <i>P</i> =0.34         |                                          |
| Military                          | 0.01 (0.00, 34.70), <i>P</i> =0.99         |                                       | 0.01 (0.00, 106.77), <i>P</i> =0.99       |                                       | 16.67 (2.62, 106.08), <i>P</i> =0.003   | 409.97 (1.87, 900104), <i>P</i> =0.029 | 0.79 (0.08, 7.51), <i>P</i> =0.84         |                                          |
| Income quartiles                  |                                            |                                       |                                           |                                       |                                         |                                        |                                           |                                          |
| Third quartile (middle class)     | Referent                                   |                                       | Referent                                  |                                       | Referent                                |                                        | Referent                                  |                                          |
| First quartile                    | 0.78 (0.23, 2.69), <i>P</i> =0.70          |                                       | 1.67 (0.42, 6.59), <i>P</i> =0.46         | 7.40 (0.77, 71.10), <i>P</i> =0.08    | 2.46 (0.59, 10.29), <i>P</i> =0.22      |                                        | 0.36 (0.09, 1.41), <i>P</i> =0.14         | 0.58 (0.03, 11.36), <i>P</i> =0.72       |
| Second quartile                   | 0.94 (0.26, 3.39), <i>P</i> =0.93          |                                       | 1.39 (0.34, 5.75), <i>P</i> =0.65         | 4.51 (0.40, 51.32), <i>P</i> =0.22    | 0.61 (0.10, 3.67), <i>P</i> =0.59       |                                        | 0.95 (0.32, 2.80), <i>P</i> =0.93         | 4.87 (0.56, 42.20), <i>P</i> =0.15       |
| Fourth quartile                   | 6.17 (1.74, 21.83), <i>P</i> =0.005        |                                       | 7.25 (1.65, 31.85), <i>P</i> =0.009       | 24.88 (2.14, 289.14), <i>P</i> =0.010 | 1.80 (0.50, 6.45), <i>P</i> =0.37       |                                        | 1.24 (0.50, 3.07), <i>P</i> =0.64         | 1.50 (0.38, 5.87), <i>P</i> =0.56        |
| Presenting symptoms               |                                            |                                       |                                           |                                       |                                         |                                        |                                           |                                          |
| Headache                          |                                            |                                       |                                           |                                       |                                         |                                        |                                           |                                          |
| No Headache                       | Referent                                   |                                       | Referent                                  |                                       | Referent                                |                                        | Referent                                  |                                          |
| Headache                          | 0.76 (0.27, 2.11), <i>P</i> =0.60          |                                       | 0.68 (0.21, 2.21), <i>P</i> =0.53         |                                       | 2.17 (0.75, 6.23), <i>P</i> =0.15       |                                        | 1.26 (0.52, 3.03), <i>P</i> =0.61         |                                          |
| DNV                               |                                            |                                       |                                           |                                       |                                         |                                        |                                           |                                          |
| No DNV                            | Referent                                   | Referent                              | Referent                                  | Referent                              | Referent                                | Referent                               | Referent                                  | Referent                                 |
| DNV                               | 2.29 (0.80, 6.57), <i>P</i> =0.12          | 3.48 (0.95, 12.74), <i>P</i> =0.060   | 2.22 (0.69, 7.15), <i>P</i> =0.18         | 5.75 (1.13, 29.23), <i>P</i> =0.035   | 0.95 (0.34, 2.67), <i>P</i> =0.93       |                                        | 0.85 (0.33, 2.19), <i>P</i> =0.73         |                                          |
| Cognitive difficulty              |                                            |                                       |                                           |                                       |                                         |                                        |                                           |                                          |
| No cognitive difficulty           | Referent                                   |                                       | Referent                                  |                                       | Referent                                |                                        | Referent                                  |                                          |
| Cognitive difficulty              | 0.66 (0.20, 2.18), <i>P</i> =0.50          |                                       | 0.68 (0.17, 2.63), <i>P</i> =0.57         |                                       | 1.74 (0.54, 5.56), <i>P</i> =0.35       |                                        | 1.34 (0.55, 3.26), <i>P</i> =0.52         |                                          |
| Gait/coordination dysfunction     |                                            |                                       |                                           |                                       |                                         |                                        |                                           |                                          |
| No gait/coordination dysfunction  | Referent                                   |                                       | Referent                                  |                                       | Referent                                |                                        | Referent                                  | Referent                                 |
| Gait/coordination dysfunction     | 0.68 (0.24, 1.96), <i>P</i> =0.48          |                                       | 0.50 (0.15, 1.73), <i>P</i> =0.27         |                                       | 0.78 (0.27, 2.25), <i>P</i> =0.64       |                                        | 1.97 (0.84, 4.60), <i>P</i> =0.12         | 1.30 (0.44, 3.86), <i>P</i> =0.64        |
| Seizures/epilepsy                 |                                            |                                       |                                           |                                       |                                         |                                        |                                           |                                          |
| No seizures/epilepsy              | Referent                                   |                                       | Referent                                  |                                       | Referent                                |                                        | Referent                                  | Referent                                 |
| Seizures/epilepsy                 | 0.28 (0.04, 2.25), <i>P</i> =0.23          |                                       | 0.35 (0.04, 2.84), <i>P</i> =0.32         |                                       | 0.61 (0.13, 2.96), <i>P</i> =0.54       |                                        | 3.72 (1.44, 9.64), <i>P</i> =0.007        | 5.23 (1.56, 17.50), <i>P</i> =0.007      |
| Sleep disturbances                |                                            |                                       |                                           |                                       |                                         |                                        |                                           |                                          |
| No sleep disturbances             | Referent                                   |                                       | Referent                                  |                                       | Referent                                |                                        | Referent                                  |                                          |
| Sleep disturbances                | 1.23 (0.52, 2.95), <i>P</i> =0.64          |                                       | 1.04 (0.41, 2.67), <i>P</i> =0.93         |                                       | 0.87 (0.34, 2.24), <i>P</i> =0.78       |                                        | 0.68 (0.26, 1.75), <i>P</i> =0.42         |                                          |
| Medical comorbidities/conditions  |                                            |                                       |                                           |                                       |                                         |                                        |                                           |                                          |
| BMI                               | 0.97 (0.91, 1.04), <i>P</i> =0.38          |                                       | 0.98 (0.91, 1.05), <i>P</i> =0.48         |                                       | 1.04 (0.98, 1.10), <i>P</i> =0.25       |                                        | 0.95 (0.88, 1.03), <i>P</i> =0.23         |                                          |
| Weight category                   |                                            |                                       |                                           |                                       |                                         |                                        |                                           |                                          |
| Normal                            | Referent                                   |                                       | Referent                                  |                                       | Referent                                |                                        | Referent                                  | Referent                                 |
| Underweight                       | 0.86 (0.09, 8.54), <i>P</i> =0.90          |                                       | 0.86 (0.09, 8.71), <i>P</i> =0.90         |                                       | 0.69 (0.07, 6.55), <i>P</i> =1.00       | 1.19 (0.13, 10.62), <i>P</i> =1.00     | 2.45 (0.23, 26.38), <i>P</i> =0.46        | 0.87 (0.03, 24.11), <i>P</i> =1.00       |
| Pre-obesity                       | 1.07 (0.39, 2.93), <i>P</i> =0.89          |                                       | 1.00 (0.33, 3.09), <i>P</i> =0.99         |                                       | 2.92 (0.79, 10.79), <i>P</i> =0.11      | 2.17 (0.15, 31.83), <i>P</i> =0.57     | 2.50 (0.82, 7.65), <i>P</i> =0.11         | 2.20 (0.43, 11.29), <i>P</i> =0.35       |
| Obesity class I                   | 0.80 (0.19, 3.31), <i>P</i> =0.75          |                                       | 0.86 (0.20, 3.73), <i>P</i> =0.84         |                                       | 8.75 (2.01, 38.14), <i>P</i> =0.004     | 272.31 (5.24, 141104), <i>P</i> =0.005 | 0.47 (0.05, 4.24), <i>P</i> =0.50         | 0.41 (0.06, 3.03), <i>P</i> =0.99        |
| Obesity class II                  | 0.27 (0.03, 2.26), <i>P</i> =0.23          |                                       | 0.31 (0.04, 2.76), <i>P</i> =0.30         |                                       | 4.38 (0.78, 24.66), <i>P</i> =0.094     | 237.49 (3.15, 179104), <i>P</i> =0.013 | 0.75 (0.08, 7.03), <i>P</i> =0.80         | 0.92 (0.06, 13.43), <i>P</i> =0.95       |
| Obesity class III                 | 0.49 (0.050, 4.45), <i>P</i> =0.53         |                                       | 0.57 (0.06, 5.41), <i>P</i> =0.63         |                                       | 0.71 (0.12, 4.18), <i>P</i> =0.99       | 0.76 (0.13, 4.36), <i>P</i> =1.00      | 0.44 (0.03, 6.58), <i>P</i> =0.99         | 0.44 (0.03, 6.69), <i>P</i> =1.00        |
| Type 2 diabetes mellitus          |                                            |                                       |                                           |                                       |                                         |                                        |                                           |                                          |
| No diabetes mellitus              | Referent                                   |                                       | Referent                                  |                                       | Referent                                |                                        | Referent                                  |                                          |
| Diabetes mellitus                 | 1.57 (0.38, 6.36), <i>P</i> =0.53          |                                       | 1.58 (0.38, 6.52), <i>P</i> =0.53         |                                       | 1.08 (0.27, 4.25), <i>P</i> =0.92       |                                        | 0.82 (0.31, 2.17), <i>P</i> =0.69         |                                          |
| Hypertension                      |                                            |                                       |                                           |                                       |                                         |                                        |                                           |                                          |
| No hypertension                   | Referent                                   |                                       | Referent                                  |                                       | Referent                                |                                        | Referent                                  |                                          |
| Hypertension                      | 1.94 (0.82, 4.63), <i>P</i> =0.13          |                                       | 1.91 (0.74, 4.89), <i>P</i> =0.18         |                                       | 1.56 (0.61, 3.99), <i>P</i> =0.36       |                                        | 0.75 (0.34, 1.66), <i>P</i> =0.48         |                                          |
| CAD or prior MI                   |                                            |                                       |                                           |                                       |                                         |                                        |                                           |                                          |
| No CAD/MI                         | Referent                                   |                                       | Referent                                  |                                       | Referent                                |                                        | Referent                                  |                                          |
| CAD/MI                            | 1.00 (0.20, 5.02), <i>P</i> =1.00          |                                       | 1.16 (0.22, 6.00), <i>P</i> =0.86         |                                       | 1.64 (0.30, 9.08), <i>P</i> =0.57       |                                        | 0.56 (0.12, 2.58), <i>P</i> =0.46         |                                          |
| PVD                               |                                            |                                       |                                           |                                       |                                         |                                        |                                           |                                          |
| No PVD                            | Referent                                   |                                       | Referent                                  |                                       | Referent                                |                                        | Referent                                  |                                          |
| PVD                               | 1.00 (0.11, 9.34), <i>P</i> =1.00          |                                       | 1.35 (0.13, 13.63), <i>P</i> =0.8         |                                       | 4.10 (0.25, 68.20), <i>P</i> =0.33      |                                        | 2.28 (0.40, 13.04), <i>P</i> =0.35        |                                          |
| Stroke                            |                                            |                                       |                                           |                                       |                                         |                                        |                                           |                                          |
| No stroke                         | Referent                                   |                                       | Referent                                  |                                       | Referent                                |                                        | Referent                                  |                                          |
| Stroke                            | 0.38 (0.05, 3.08), <i>P</i> =0.36          |                                       | 0.42 (0.05, 3.49), <i>P</i> =0.42         |                                       | 0.33 (0.04, 2.69), <i>P</i> =0.3        |                                        | 1.58 (0.64, 3.92), <i>P</i> =0.33         |                                          |
| History of Afib or flutter        |                                            |                                       |                                           |                                       |                                         |                                        |                                           |                                          |
| No Afib                           | Referent                                   |                                       | Referent                                  |                                       | Referent                                |                                        | Referent                                  |                                          |
| Afib                              | 2.04 (0.18, 23.40), <i>P</i> =0.57         |                                       | 2.05 (0.18, 23.67), <i>P</i> =0.57        |                                       | 0.01 (0.00, 6.22), <i>P</i> =0.99       |                                        | 0.72 (0.15, 3.37), <i>P</i> =0.67         |                                          |
| CHF                               |                                            |                                       |                                           |                                       |                                         |                                        |                                           |                                          |
| No CHF                            | Referent                                   |                                       | Referent                                  |                                       | Referent                                |                                        | Referent                                  |                                          |
| CHF                               | 0.01 (0.00, 8.08), <i>P</i> =0.99          |                                       | 0.01 (0.00, 10.12), <i>P</i> =0.99        |                                       | 0.01 (0.00, 7.43), <i>P</i> =0.99       |                                        | 1.22 (0.32, 4.66), <i>P</i> =0.77         |                                          |
| CVR                               |                                            |                                       |                                           |                                       |                                         |                                        |                                           |                                          |
| No CVR                            | Referent                                   |                                       | Referent                                  |                                       | Referent                                |                                        | Referent                                  |                                          |
| CVR                               | 4.12 (0.25, 68.16), <i>P</i> =0.32         |                                       | 4.14 (0.25, 68.98), <i>P</i> =0.32        |                                       | NA                                      |                                        | 1128.98 (0.00, 5.6810124), <i>P</i> =0.99 |                                          |
| History of head trauma            |                                            |                                       |                                           |                                       |                                         |                                        |                                           |                                          |
| No history of head trauma         | Referent                                   | Referent                              | Referent                                  | Referent                              | Referent                                |                                        | Referent                                  | Referent                                 |
| History of head trauma            | 0.34 (0.08, 1.57), <i>P</i> =0.17          | 0.46 (0.08, 2.61), <i>P</i> =0.38     | 0.36 (0.08, 1.69), <i>P</i> =0.20         | 0.18 (0.02, 1.55), <i>P</i> =0.12     | 0.55 (0.06, 4.73), <i>P</i> =0.59       |                                        | 0.23 (0.03, 1.78), <i>P</i> =0.16         | 0.52 (0.08, 3.39), <i>P</i> =0.99        |
| History of cancer/neoplasm        |                                            |                                       |                                           |                                       |                                         |                                        |                                           |                                          |
| No history of cancer/neoplasm     | Referent                                   |                                       | Referent                                  |                                       | Referent                                |                                        | Referent                                  |                                          |
| History of cancer/neoplasm        | 1.78 (0.61, 5.16), <i>P</i> =0.29          |                                       | 0.63 (0.13, 3.06), <i>P</i> =0.57         |                                       | 0.99 (0.19, 5.02), <i>P</i> =0.99       |                                        | 130.97 (0.49, 35213.75), <i>P</i> =0.99   |                                          |
| OSA                               |                                            |                                       |                                           |                                       |                                         |                                        |                                           |                                          |
| No OSA                            | Referent                                   |                                       | Referent                                  |                                       | Referent                                |                                        | Referent                                  |                                          |
| OSA                               | 1.27 (0.38, 4.28), <i>P</i> =0.70          |                                       | 1.56 (0.44, 5.45), <i>P</i> =0.49         |                                       | 1.54 (0.44, 5.38), <i>P</i> =0.50       |                                        | 0.70 (0.15, 3.28), <i>P</i> =0.65         |                                          |
| Asthma/COPD                       |                                            |                                       |                                           |                                       |                                         |                                        |                                           |                                          |
| No Asthma/COPD                    | Referent                                   | Referent                              | Referent                                  | Referent                              | Referent                                |                                        | Referent                                  | Referent                                 |
| Asthma/COPD                       | 0.40 (0.09, 1.84), <i>P</i> =0.24          | 10.74 (0.02, 7194.83), <i>P</i> =0.99 | 0.23 (0.03, 1.86), <i>P</i> =0.17         | 0.38 (0.05, 3.19), <i>P</i> =0.99     | 1.53 (0.49, 4.84), <i>P</i> =0.47       |                                        | 3.42 (1.42, 8.21), <i>P</i> =0.006        | 4.47 (1.07, 18.71), <i>P</i> =0.040      |
| GERD                              |                                            |                                       |                                           |                                       |                                         |                                        |                                           |                                          |
| No GERD                           | Referent                                   |                                       | Referent                                  |                                       | Referent                                |                                        | Referent                                  |                                          |
| GERD                              | 0.01 (0.00, 3.44), <i>P</i> =0.99          |                                       | 0.01 (0.00, 5.71), <i>P</i> =0.99         |                                       | 0.01 (0.00, 5.58), <i>P</i> =0.99       |                                        | 0.95 (0.19, 4.60), <i>P</i> =0.95         |                                          |
| Diverticular disease              |                                            |                                       |                                           |                                       |                                         |                                        |                                           |                                          |
| No diverticular disease           | Referent                                   |                                       | Referent                                  |                                       | Referent                                |                                        | Referent                                  |                                          |
| Diverticular disease              | 1069.35 (0.00, 6.88 10124), <i>P</i> =0.99 |                                       | 1074.23 (0.00, 6.7110124), <i>P</i> =0.99 |                                       | 4.25 (0.56, 32.02), <i>P</i> =0.16      |                                        | 0.70 (0.08, 6.05), <i>P</i> =0.75         |                                          |
| Autoimmune disease                |                                            |                                       |                                           |                                       |                                         |                                        |                                           |                                          |
| No autoimmune disease             | Referent                                   |                                       | Referent                                  |                                       | Referent                                |                                        | Referent                                  |                                          |
| Autoimmune disease                | 0.65 (0.08, 5.68), <i>P</i> =0.7           |                                       | 1.00 (0.11, 9.42), <i>P</i> =1.00         |                                       | 2.02 (0.18, 23.39), <i>P</i> =0.57      |                                        | 1.75 (0.33, 9.47), <i>P</i> =0.51         |                                          |
| Thyroid disease                   |                                            |                                       |                                           |                                       |                                         |                                        |                                           |                                          |
| No thyroid disease                | Referent                                   |                                       | Referent                                  |                                       | Referent                                |                                        | Referent                                  |                                          |
| Thyroid disease                   | 0.49 (0.11, 2.31), <i>P</i> =0.37          |                                       | 0.63 (0.13, 3.06), <i>P</i> =0.57         |                                       | 2.19 (0.60, 8.09), <i>P</i> =0.24       |                                        | 0.49 (0.14,                               |                                          |
